# Supplementary material for: Impact of Cold Storage on Bioactive Compounds and Their Stability of 36 Organically Grown Beetroot Genotypes
Source: MDPI journal article supplement (doi:10.3390/foods10061281), 2021-06-04
Supplement: s1 [file s1]

**Table S1.** Median values of nitrate content (mg kg<sup>-1</sup> DW) of 36 beetroot genotypes grown at the research station Kleinhohenheim within the year 2017 and 2018, based on genotype and storage period. Results represent the median values  $\pm$  asymptotic standard error. Medians followed by at least one identical lower-case letter did not differ significantly between genotypes at experiment-wise Type 1 error  $\alpha = 0.05$ . Medians followed by at least one identical upper-case letter did not differ significantly between storage periods at experiment-wise Type 1 error  $\alpha = 0.05$ .

| <b>(A) Medians based on genotype</b>       |                                        |
|--------------------------------------------|----------------------------------------|
| <b>Genotype</b>                            | <b>Nitrate (mg kg<sup>-1</sup> DW)</b> |
| Ä. P.                                      | 10160 <sup>ac</sup> $\pm$ 1975         |
| Akela RZ                                   | 13509 <sup>ac</sup> $\pm$ 2279         |
| Alvro Mono                                 | 16438 <sup>ab</sup> $\pm$ 2539         |
| Betina                                     | 7166 <sup>ac</sup> $\pm$ 1676          |
| Bolivar                                    | 8253 <sup>ac</sup> $\pm$ 1781          |
| Bona                                       | 16794 <sup>ab</sup> $\pm$ 2540         |
| Bordo                                      | 8691 <sup>ac</sup> $\pm$ 1827          |
| Boro F1                                    | 12100 <sup>ac</sup> $\pm$ 2157         |
| BoRu1                                      | 8685 <sup>ac</sup> $\pm$ 1848          |
| Borus                                      | 6365 <sup>bcd</sup> $\pm$ 1613         |
| Burpees G.                                 | 12306 <sup>ac</sup> $\pm$ 2175         |
| Carillon RZ                                | 15532 <sup>ad</sup> $\pm$ 2443         |
| Cervena K.                                 | 8896 <sup>ac</sup> $\pm$ 1893          |
| Ceryl                                      | 5838 <sup>bcd</sup> $\pm$ 1534         |
| Chrobry                                    | 4179 <sup>c</sup> $\pm$ 1267           |
| Czerwona K. 2                              | 8209 <sup>ac</sup> $\pm$ 1811          |
| Detroit 2 D. R.                            | 8103 <sup>ac</sup> $\pm$ 1812          |
| Detroit 3                                  | 11757 <sup>ac</sup> $\pm$ 2147         |
| Detroit G.                                 | 11788 <sup>ac</sup> $\pm$ 2186         |
| Formanova                                  | 13534 <sup>ac</sup> $\pm$ 2306         |
| Forono                                     | 12177 <sup>ac</sup> $\pm$ 2179         |
| Gesche SG                                  | 12406 <sup>ac</sup> $\pm$ 2183         |
| Jannis                                     | 10737 <sup>ac</sup> $\pm$ 2031         |
| Jawor                                      | 11555 <sup>ac</sup> $\pm$ 2107         |
| Libero RZ                                  | 20489 <sup>a</sup> $\pm$ 2988          |
| Monty RZ F1                                | 7327 <sup>ac</sup> $\pm$ 1678          |
| Nobol                                      | 12474 <sup>ac</sup> $\pm$ 2190         |
| Nochowski                                  | 4602 <sup>cd</sup> $\pm$ 1330          |
| Pablo F1                                   | 13615 <sup>ac</sup> $\pm$ 2310         |
| Regulski O.                                | 9359 <sup>ac</sup> $\pm$ 1896          |
| Robuschka                                  | 11129 <sup>ac</sup> $\pm$ 2067         |
| Ronjana                                    | 13002 <sup>ac</sup> $\pm$ 2236         |
| Hilmar                                     | 5190 <sup>bcd</sup> $\pm$ 1412         |
| Sniezna Kula                               | 9987 <sup>ac</sup> $\pm$ 1979          |
| Tondo d. Ch.                               | 15947 <sup>ad</sup> $\pm$ 2678         |
| UB-E3                                      | 12745 <sup>ac</sup> $\pm$ 2235         |
| <b>(B) Medians based on storage period</b> |                                        |
| <b>Storage period</b>                      |                                        |
| Directly after harvest                     | 9095 <sup>B</sup> $\pm$ 414            |
| 1 month after cold storage                 | 10977 <sup>A</sup> $\pm$ 459           |
| 4 months after cold storage                | 10997 <sup>A</sup> $\pm$ 473           |
